# Supplementary material for: Population dynamics of epidemic and endemic states of drug-resistance emergence in infectious diseases
Source: PeerJ journal article supplement (doi:10.7717/peerj.2817), 2017-01-10

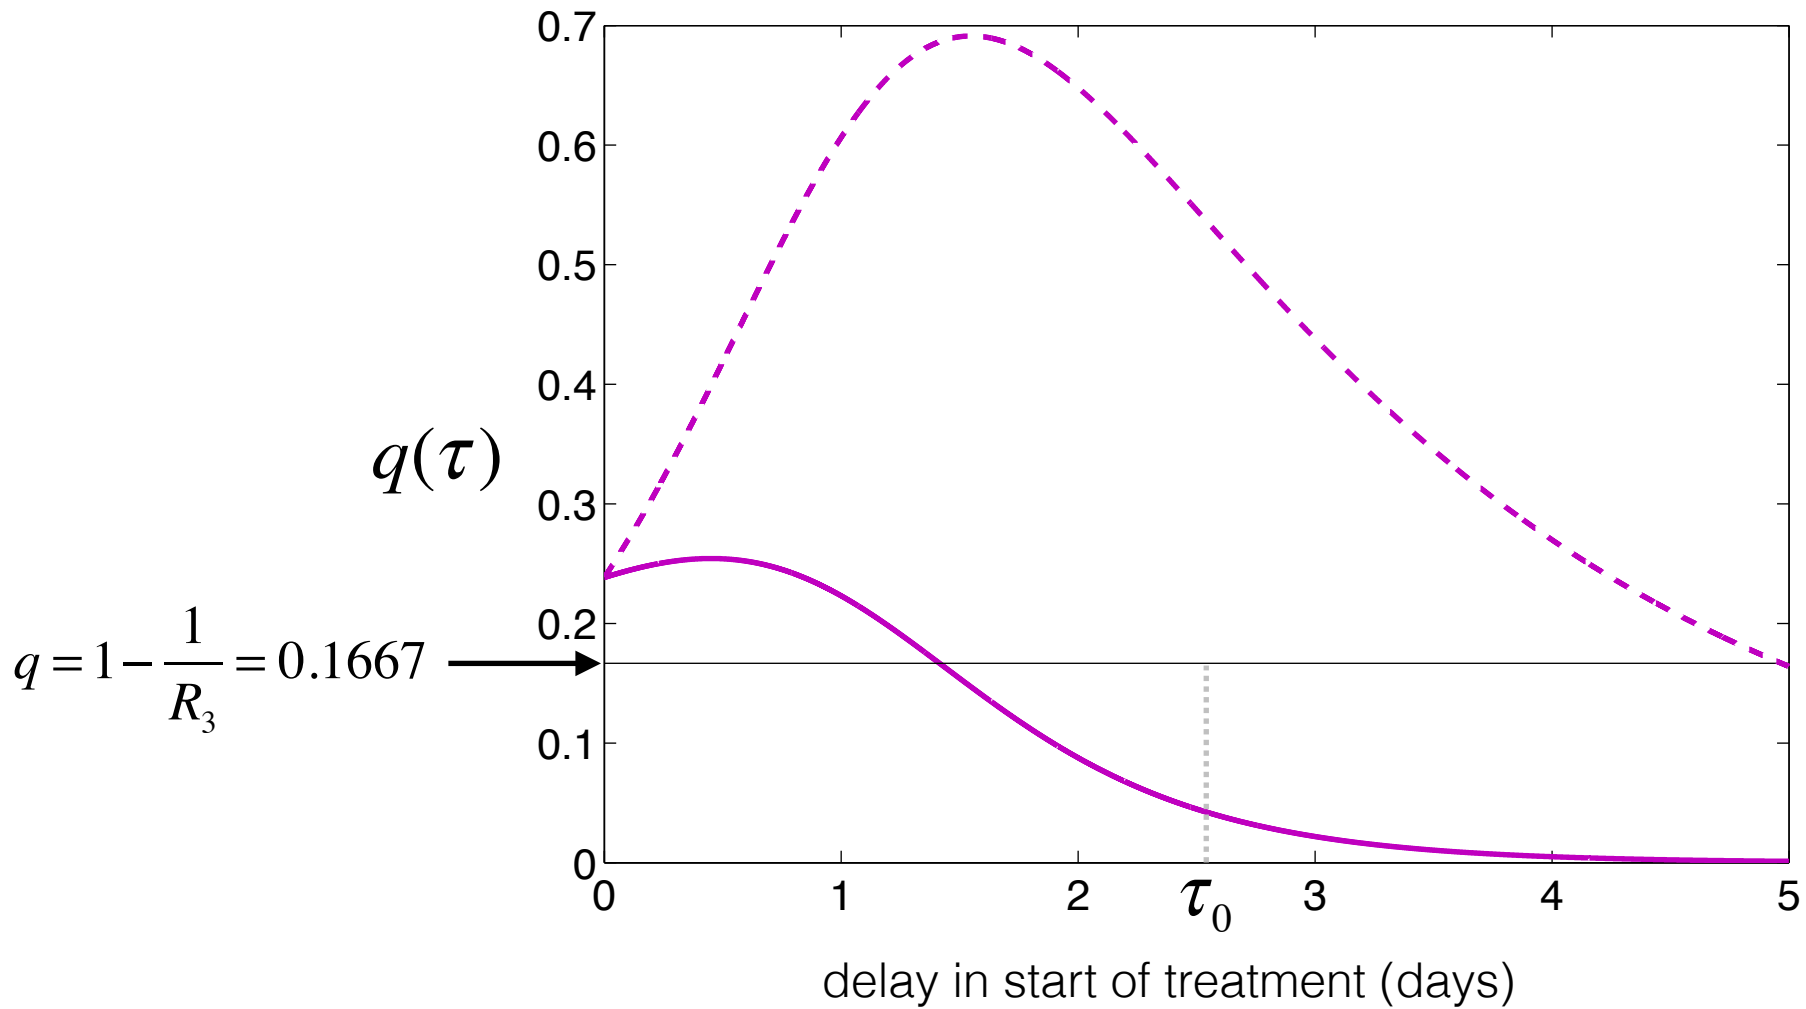

Supplement: FigS1.pdf [file FigS1.pdf]
